# Supplementary material for: Toward a Geography of Art
Source: Hindawi journal article supplement (doi:10.1155/2013/241721), 2004-01-01
Supplement: f1 [file 241721.f1.pdf]

## Supplemental gross photographs of the mice

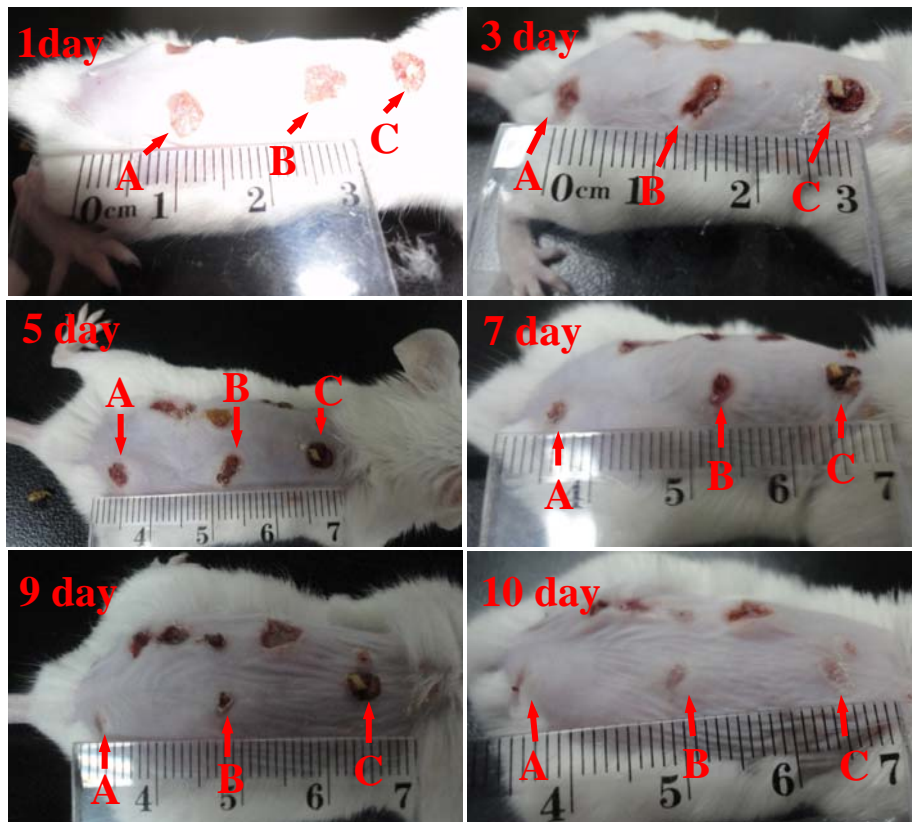

### Supplemental Figure 1. wound healing of the mice at different times post wounding

The 1 day to 10 day on the plate are days of post wounding, respectively. The A, B and C are wounds treated by commercial Tβ4 protein, *E.coli*-derived recombinant 4×Tβ4 protein and 0.9% physiological saline, respectively.
